# Supplementary material
Source: publisher figshare collection journal article supplement (https://sage.figshare.com/ndownloader/files/22660679)
Supplement: Supplementary file 1 [file 22660679]

# **Supplementary material for “Do Discount Presentations Influence Gift Purchase Intentions and Attitudes of Chinese Outbound Tourists?”**

## **Appendix A: Scenarios**

### **Study 1:**

#### *Chinese version*

请想象你正在某个西方发达国家旅游。由于明天你就要结束行程乘坐飞机回国，你准备今天为你国内的亲朋购买一些纪念品。你来到了位于市中心的一家著名旅游纪念品商店。你发现目前这家商店正在进行全店促销，横幅上用英语写着：“Pay 88% of the regular price” (中文翻译: “全场 88 折”) vs. “Get 12% off the regular price” (中文翻译: “全场减价 12%”) vs. “Pay 85% of the regular price” (中文翻译: “全场 85 折”) vs. “Get 15% off the regular price” (中文翻译: “全场减价 15%”)。

#### *English version*

Imagine you were traveling in a Western-developed country for leisure purposes. Today you planned to buy some gifts for your relatives and friends in China, as tomorrow you would fly back. You came to a famous gift shop in the city downtown and found that the gift shop was on a storewide promotion. What was written on the promotion banner was “Pay 88% of the regular price” (Chinese translation: “全场 88 折”) vs. “Get 12% off the regular price” (Chinese translation: “全场减 12%”) vs. “Pay 85% of the regular price” (Chinese translation: “全场 85 折”) vs. “Get 15% off the regular price” (Chinese translation: “全场减 15%”).

## Study 2:

### *Chinese version*

请想象你正在某个西方发达国家旅游。由于明天你就要结束行程乘坐飞机回国，你准备今天为你国内的亲朋购买一些纪念品。你来到了位于市中心的一家著名旅游纪念品商店。你发现目前这家商店正在进行全店促销，横幅上用英语写着：“Pay 88% of the regular price” (中文翻译: “全场 88 折”) vs. “Get 12% off the regular price” (中文翻译: “全场减价 12%”)。

你得知这家旅游纪念品商店的店主是中国人 vs. 西方人。

### *English version*

Imagine you were traveling in a Western-developed country for leisure purposes. Today you planned to buy some gifts for your relatives and friends in China, as tomorrow you would fly back. You came to a famous gift shop in the city downtown and found that the gift shop was on a storewide promotion. What was written on the promotion banner was “Pay 88% of the regular price” (Chinese translation: “全场 88 折”) vs. “Get 12% off the regular price” (Chinese translation: “全场减 12%”).

The owner of this gift shop was “Chinese” vs. “a Westerner.”

## Appendix B: Measures

| Variables                                                          | Measures (all 7-point scales)                                                                                                                                                                                                                                                                                           | Reliability Coefficients |                 |
|--------------------------------------------------------------------|-------------------------------------------------------------------------------------------------------------------------------------------------------------------------------------------------------------------------------------------------------------------------------------------------------------------------|--------------------------|-----------------|
|                                                                    |                                                                                                                                                                                                                                                                                                                         | Study 1                  | Study 2         |
| Purchase intentions (Oliver and Swan 1989)                         | What is the likelihood of you purchasing some gifts in this gift store based on the scenario? (unlikely-likely, impossible-possible, improbable-probable)                                                                                                                                                               | $\alpha = 0.82$          | $\alpha = 0.79$ |
| Attitudes towards the gift shop (Letheren, Martin, and Jin 2017)   | What do you think about the gift shop? (bad-good, unfavorable-favorable, negative-positive)                                                                                                                                                                                                                             | $\alpha = 0.80$          | $\alpha = 0.81$ |
| Attitudes towards the destination (Letheren, Martin, and Jin 2017) | What do you think about the city where the gift shop is located? (bad-good, unfavorable-favorable, negative-positive)                                                                                                                                                                                                   | $\alpha = 0.82$          | $\alpha = 0.84$ |
| Familiarity (Kim and Kramer 2006)                                  | How do you perceive the price discount presentation used in the scenario? (unfamiliar-familiar)                                                                                                                                                                                                                         | -                        | -               |
| Cultural icon *                                                    | Please indicate your agreement on the following statement: (1 = strongly disagree, 7 = strongly agree)<br>1. X** is a lucky number combination.<br>2. X has a special meaning exclusively to Chinese people.<br>3. X is a cultural icon for Chinese people.                                                             | $\alpha = 0.92$          | $\alpha = 0.89$ |
| Cultural acknowledgment (Kraemer, Gouthier, and Heidenreich 2017)  | Please indicate your agreement towards the following statements: (1 = strongly disagree, 7 = strongly agree)<br>1. The shop owner acknowledges my culture.<br>2. This destination retailer recognizes my culture.<br>3. This destination city respects my culture.<br>4. My culture is honored by this Western country. |                          | $\alpha = 0.87$ |
| Positive affect (Williams and DeSteno 2008)                        | Please indicate the extent to which you felt as you were reading the scenario on the following scale (1 = not at all, 7 = extremely)<br>1. Good<br>2. Happy<br>3. Pleasant<br>4. Content                                                                                                                                |                          | $\alpha = 0.88$ |
| Retailer COO                                                       | Please recall the scenario, what is the retailer country of origin? (Chinese-Western)                                                                                                                                                                                                                                   |                          | -               |

Notes:

\* Items in this construct were developed based on the definition of a cultural icon.

\*\* X represents the number (e.g., 88, 12, 85, and 15) in the discount presentation.

## Reference

- Kim, H. M., and T. Kramer. 2006. "Pay 80%" versus "Get 20% off": The Effect of Novel Discount Presentation on Consumers' Deal Perceptions." *Marketing Letters* 17 (4): 311–21.
- Kraemer, T., M. H. J. Gouthier, and S. Heidenreich. 2017. "Proud to Stay or Too Proud to Stay? How Pride in Personal Performance Develops and How it Affects Turnover Intentions." *Journal of Service Research* 20 (2): 152–70.
- Letheren, K., B. A. S. Martin, and H. S. Jin. 2017. "Effects of Personification and Anthropomorphic Tendency on Destination Attitude and Travel Intentions." *Tourism Management* 62: 65–75.
- Oliver, R. L., and J. E. Swan. 1989. "Consumer Perceptions of Interpersonal Equity and Satisfaction in Transactions: A Field Survey Approach." *Journal of Marketing* 53 (2): 21–35.
- Williams, L. A., and D. DeSteno. 2008. "Pride and Perseverance: The Motivational Role of Pride." *Journal of Personality and Social Psychology* 94 (6): 1007–17.
